# Supplementary material for: Information sharing and channel encroachment in biomass supply chains
Source: PubMed Central journal article supplement (PMC11414914; doi:10.1371/journal.pone.0310539), 2024-09-20
Supplement: pone.0310539.s001.pdf [file pone.0310539.s001.pdf]

# Appendix 1 Derivation process

## Proofs of Scenarios NN, NM, EN and EM

Using the equality  $E(\pi_F) = (w_1 - c_1)d_1$ , we have  $\frac{\partial^2 E(\pi_F)}{\partial w_1^2} = -2 < 0$ , which shows that

$E(\pi_F)$  is concave in  $w_1$ . From  $\frac{\partial E(\pi_F)}{\partial w_1} = 0$ , we get the reaction function  $w_1 = A + c_1 - p_1$ .

Since the farmer does not know the demand information, he will therefore set a fixed

wholesale price  $w_1 = a_0 + c_1 - p_1$ . Substituting  $w_1 = a_0 + c_1 - p_1$  into the equality  $E(\pi_M) =$

$(p_1 - w_1 - c_2)d_1$ , we have  $\frac{\partial^2 E(\pi_M)}{\partial p_1^2} = -4 < 0$ , which shows that  $E(\pi_M)$  is concave in  $p_1$ . From

$\frac{\partial E(\pi_M)}{\partial p_1} = 0$ , we have  $p_1 = \frac{1}{4}(3a_0 + c_1 + c_2)$ . Substituting  $p_1 = \frac{1}{4}(3a_0 + c_1 + c_2)$  into the

mentioned  $w_1 = a_0 + c_1 - p_1$ , we obtain the suitable outcomes for Scenario NN.

Using a similar approach, we can obtain the equilibrium result for Scenarios NM, EN and EM, and the proof is omitted here.

## Proofs of Scenarios NF, NFM, EF and EFM

Using the equality  $E(\pi_F) = (w_1 - c_1)d_1$ , we have  $\frac{\partial^2 E(\pi_F)}{\partial w_1^2} = -2 < 0$ , which shows that

$E(\pi_F)$  is concave in  $w_1$ . From  $\frac{\partial E(\pi_F)}{\partial w_1} = 0$ , we get the reaction function  $w_1 = A + c_1 - p_1$ .

Since the middleman does not know the demand information, he will set his retail price based

on the expectation of the wholesale price. Thus, substituting  $w_1 = a_0 + c_1 - p_1$  into the

equality  $E(\pi_M) = (p_1 - w_1 - c_2)d_1$ , we have  $\frac{\partial^2 E(\pi_M)}{\partial p_1^2} = -4 < 0$ , which shows that  $E(\pi_M)$  is

concave in  $p_1$ . From  $\frac{\partial E(\pi_M)}{\partial p_1} = 0$ , we have  $p_1 = \frac{1}{4}(3a_0 + c_1 + c_2)$ . Substituting  $p_1 = \frac{1}{4}(3a_0 +$

$c_1 + c_2)$  into the mentioned  $w_1 = A + c_1 - p_1$ , we obtain the suitable outcomes for

Scenario NF.

Using a similar approach, we can obtain the equilibrium result for Scenarios NFM, EF and EFM, and the proof is omitted here.

## Proofs of Propositions

**Proposition 1.** By comparing with the equilibrium results, we have:  $w_1^{NM} - w_1^{NN} = \frac{a_0 - A}{2}$ ;

$w_1^{NN} - w_1^{NFM} = \frac{a_0 - A}{4}$ ;  $w_1^{NFM} - w_1^{NF} = \frac{3(a_0 - A)}{4}$ . Therefore, when  $A > a_0$ ,  $w_1^{NM} < w_1^{NN} < w_1^{NFM} <$

$w_1^{NF}$ . In a similar way, we can get the rest of Proposition 1.

**Propositions 2-5.** Using a similar logic as in Proposition 1, we obtain Propositions 2-5, and the proof is omitted here.
